# Supplementary material
Source: PubMed Central journal article supplement (PMC4474528)

Figure S1

**A**

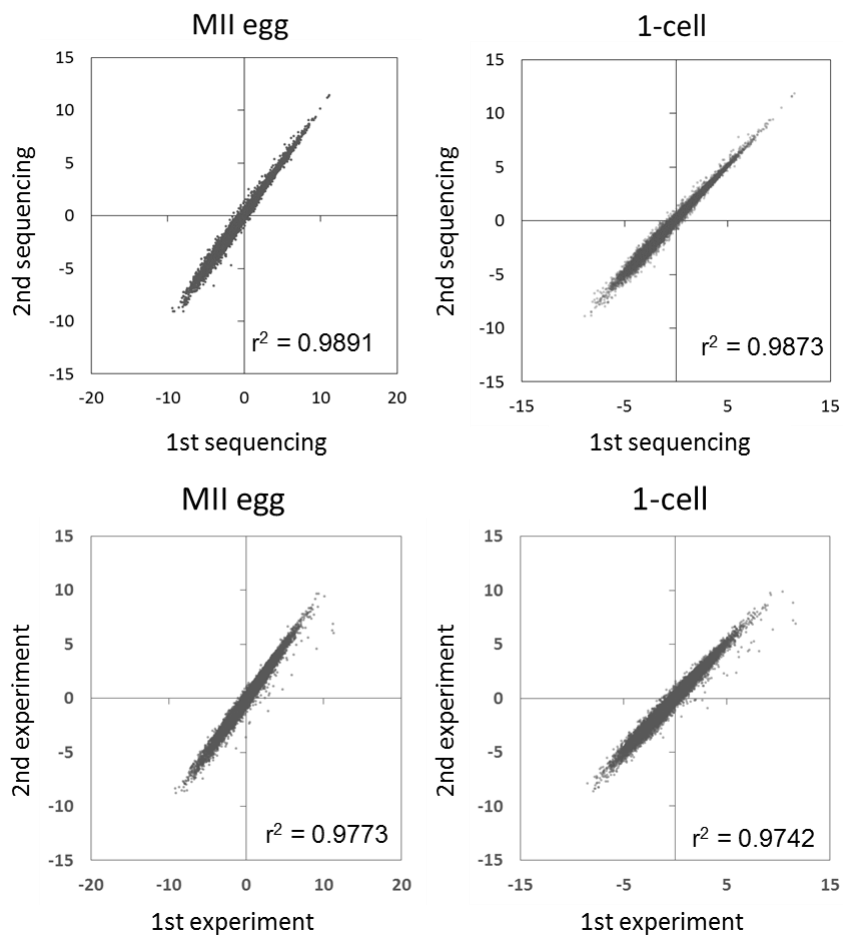

**B**

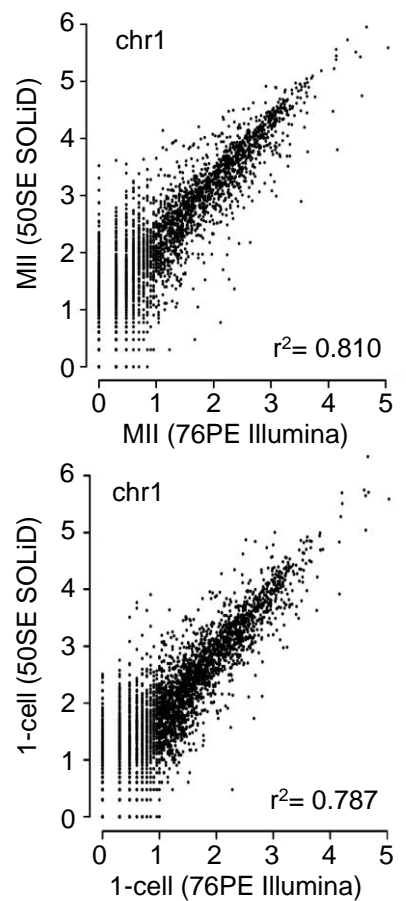

**C**

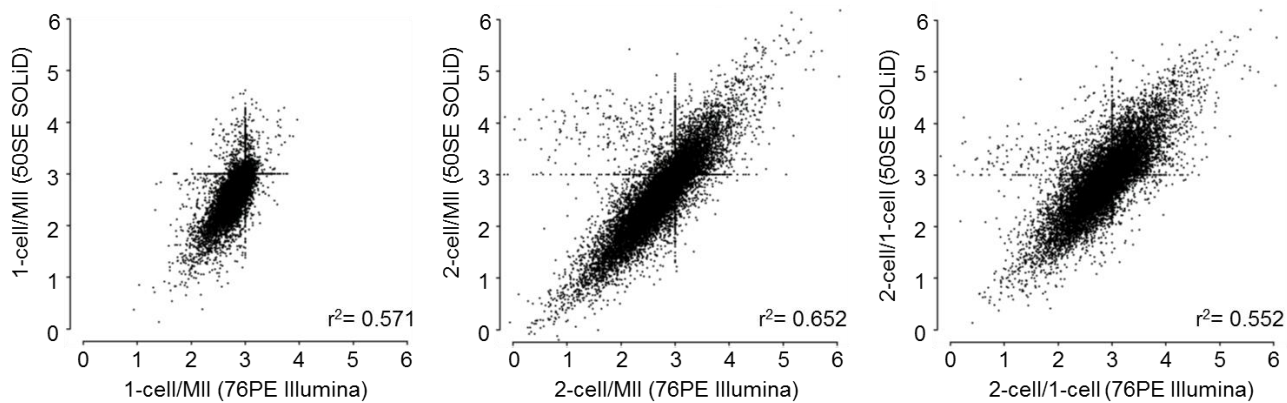

**D**

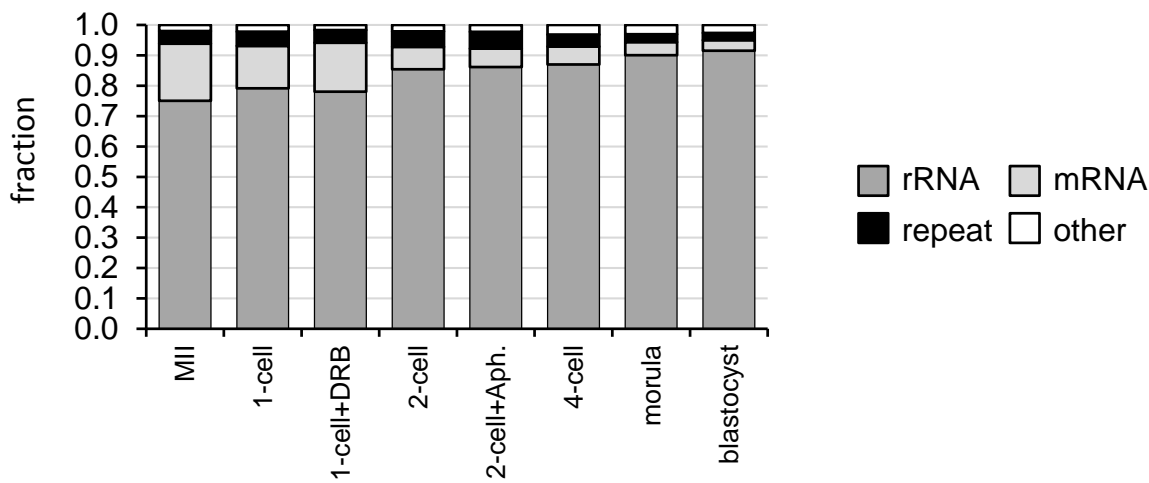

Figure S2

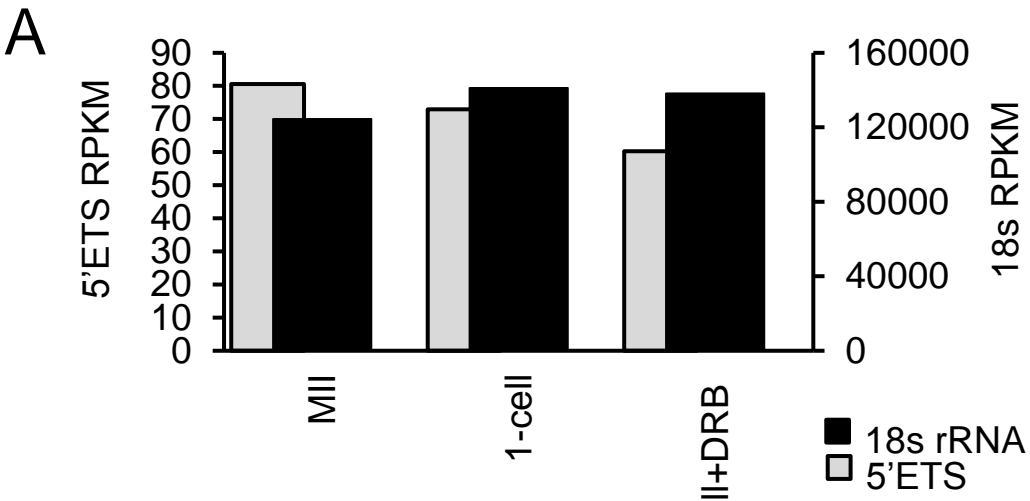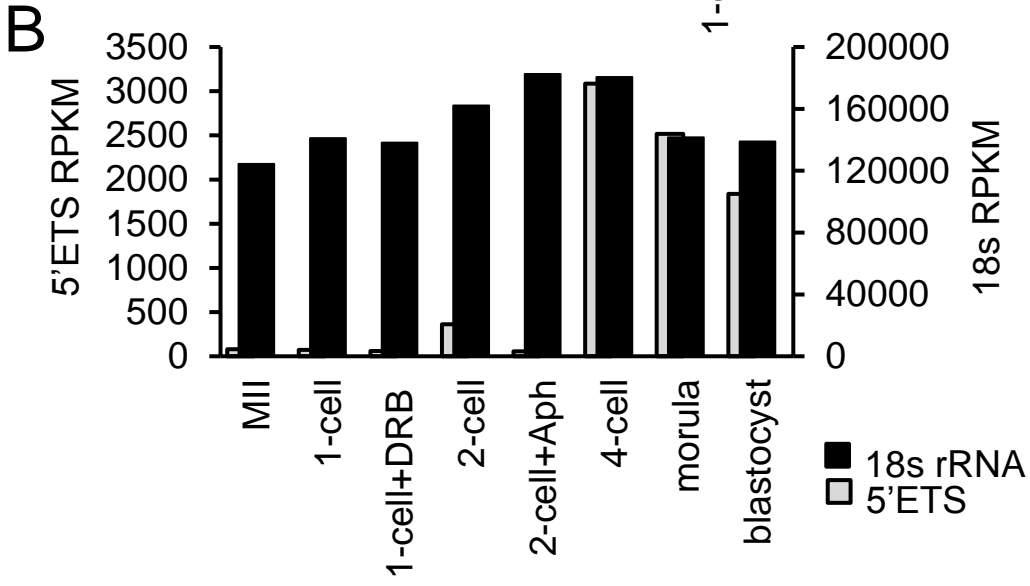

Figure S3

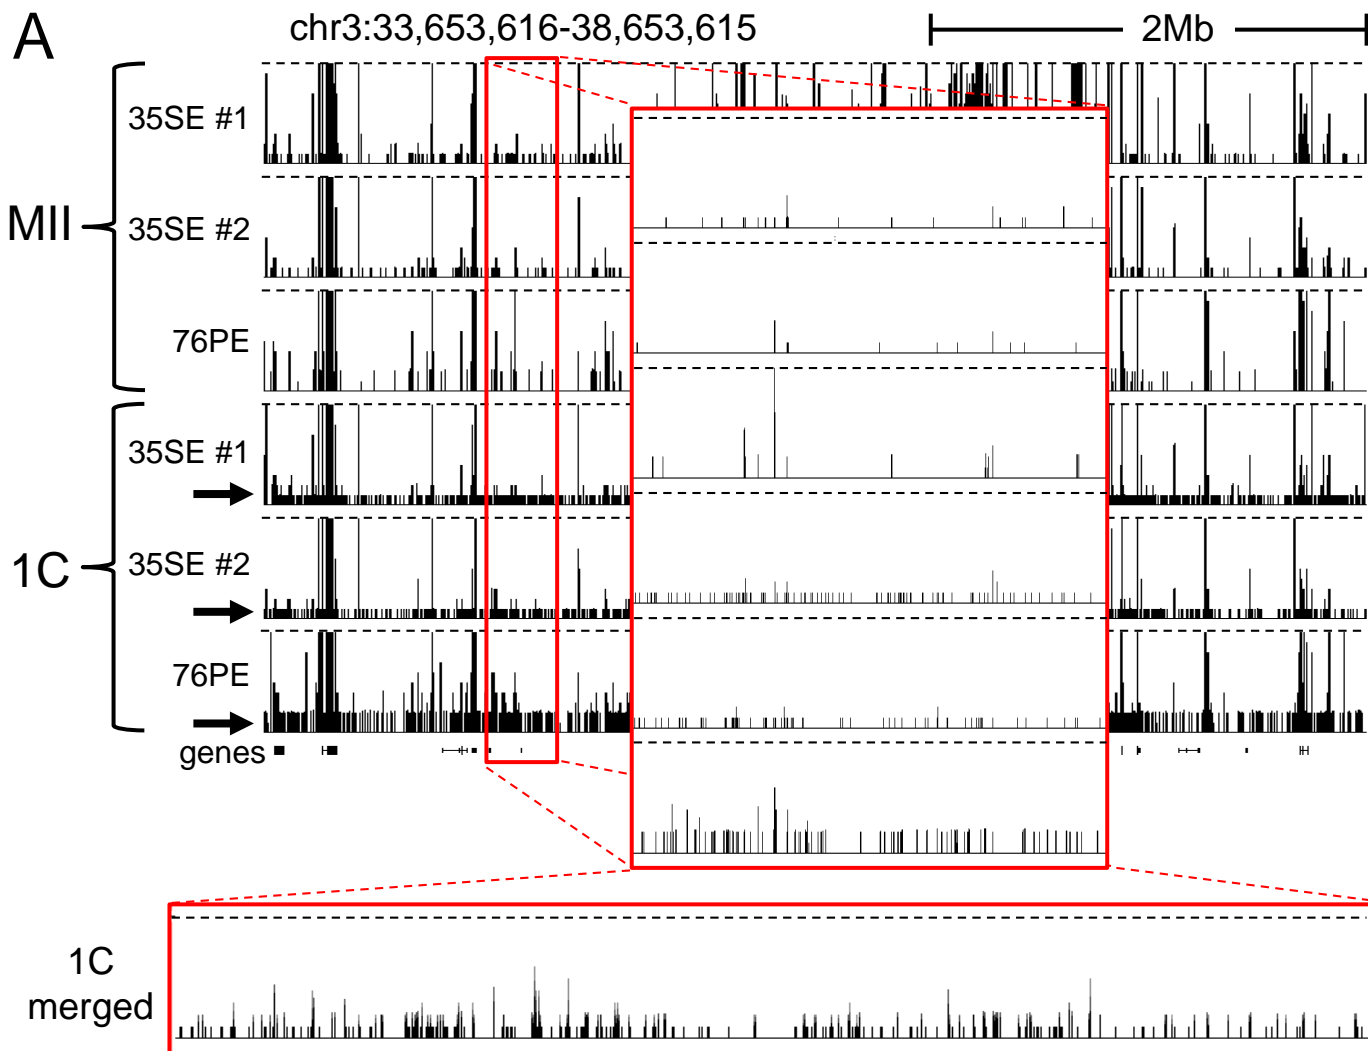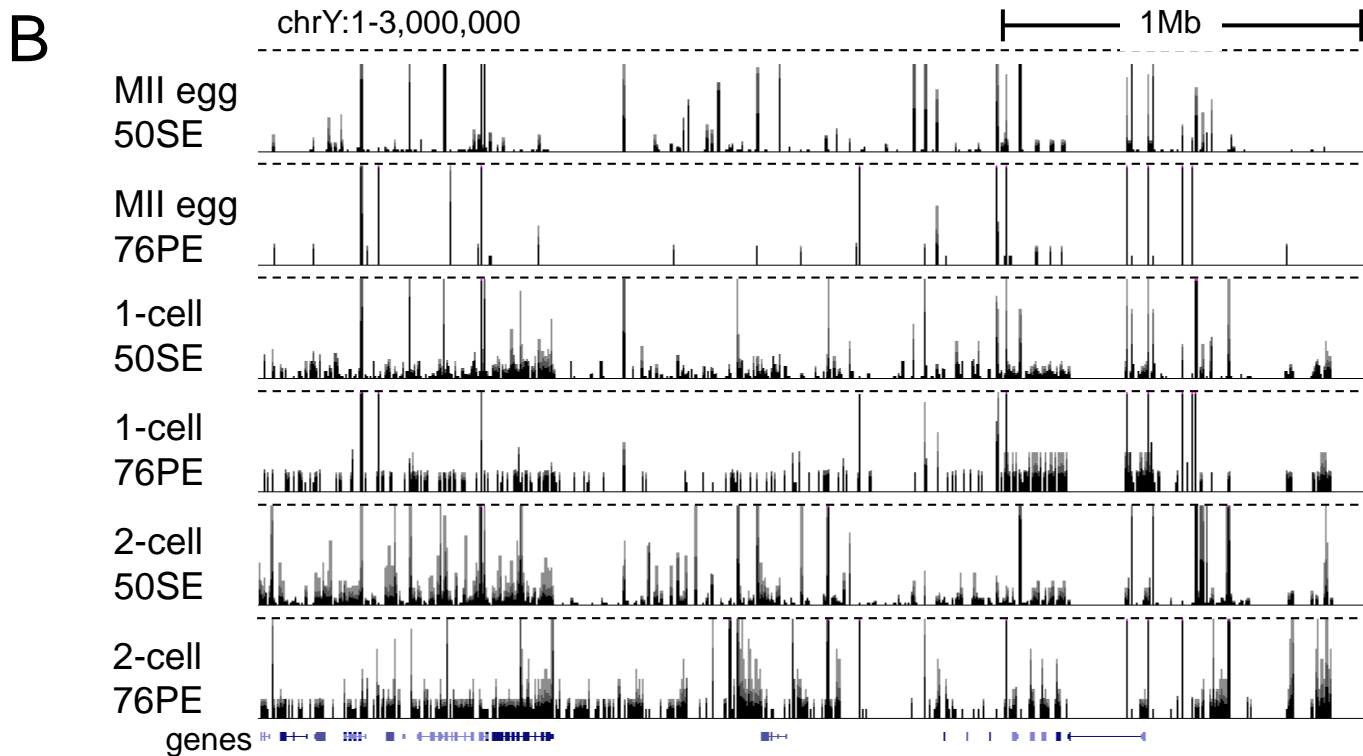

Figure S4

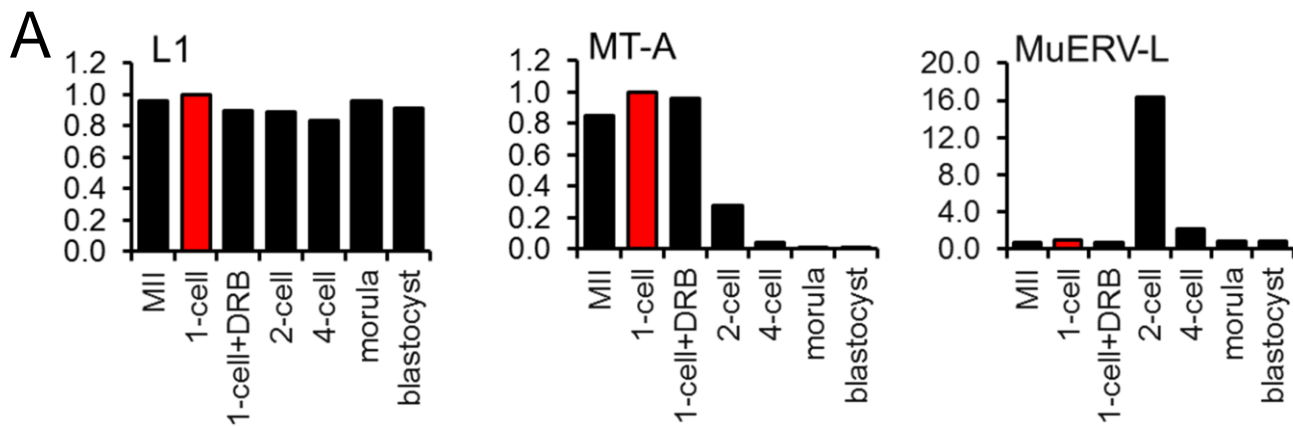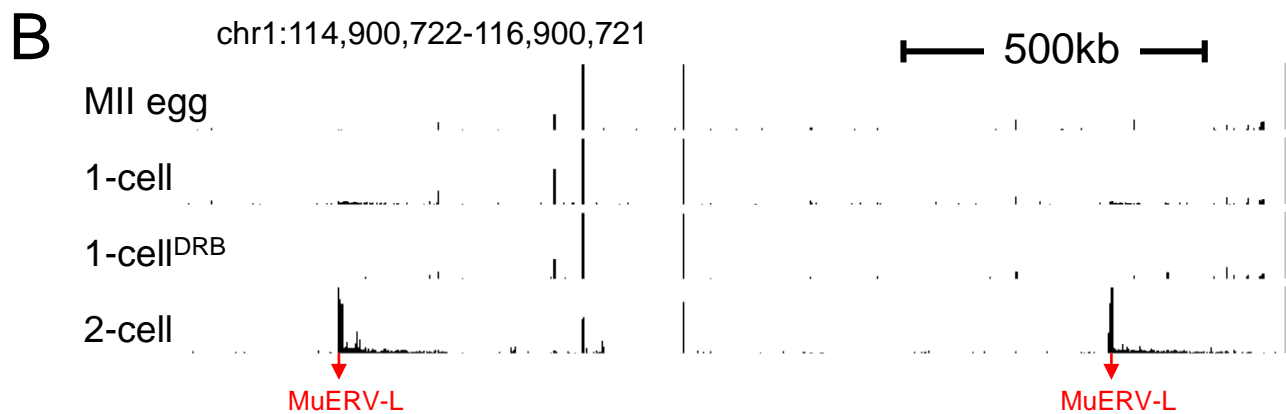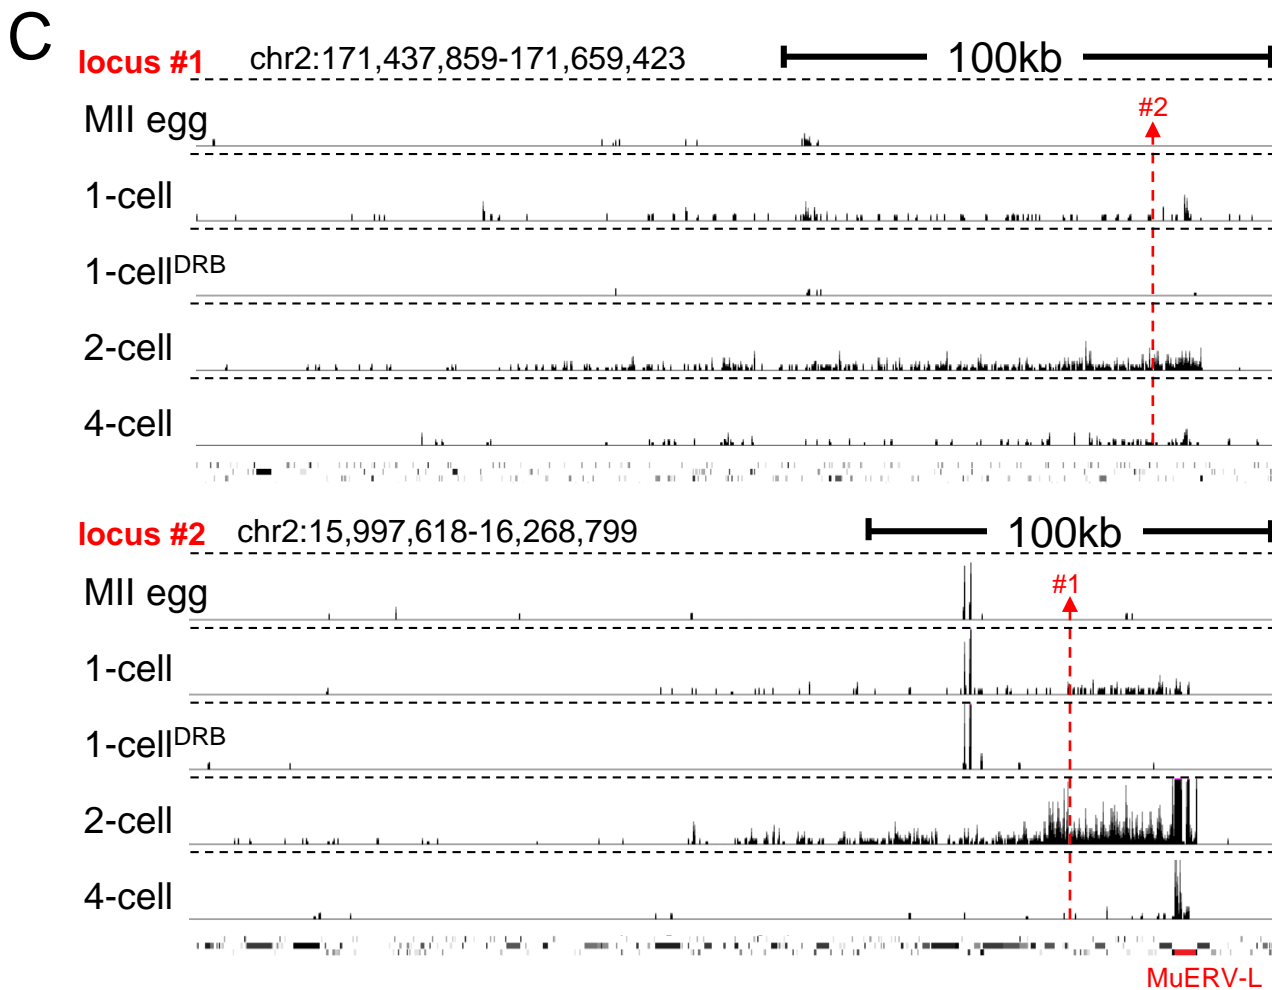

Figure S5

A

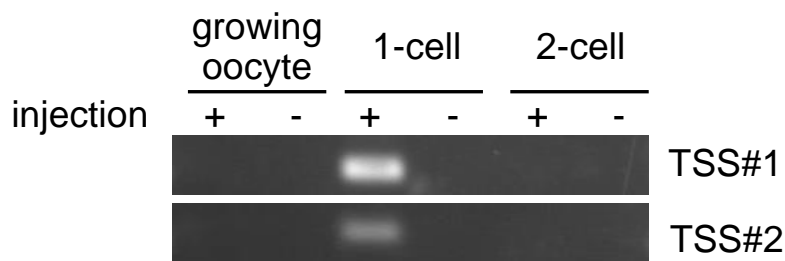

B

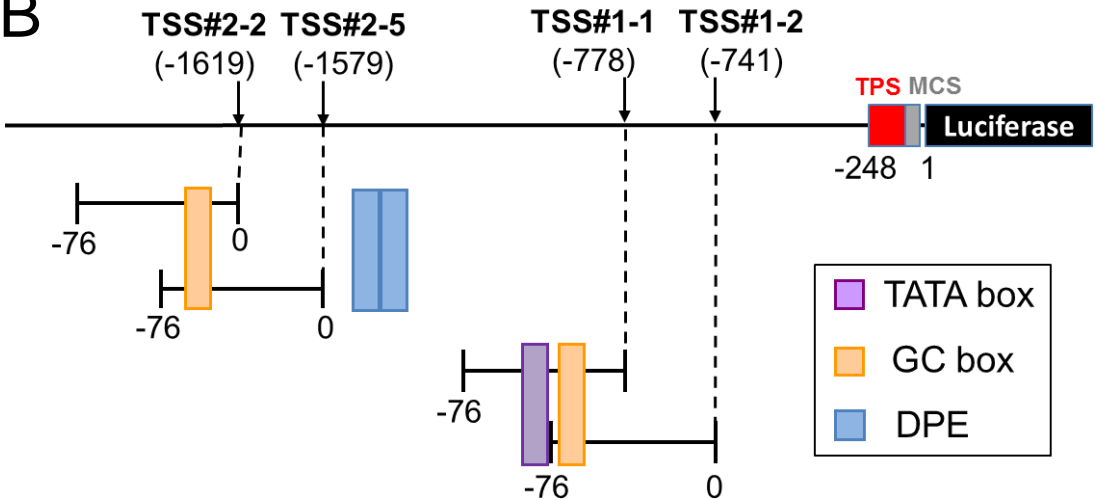

Figure S6

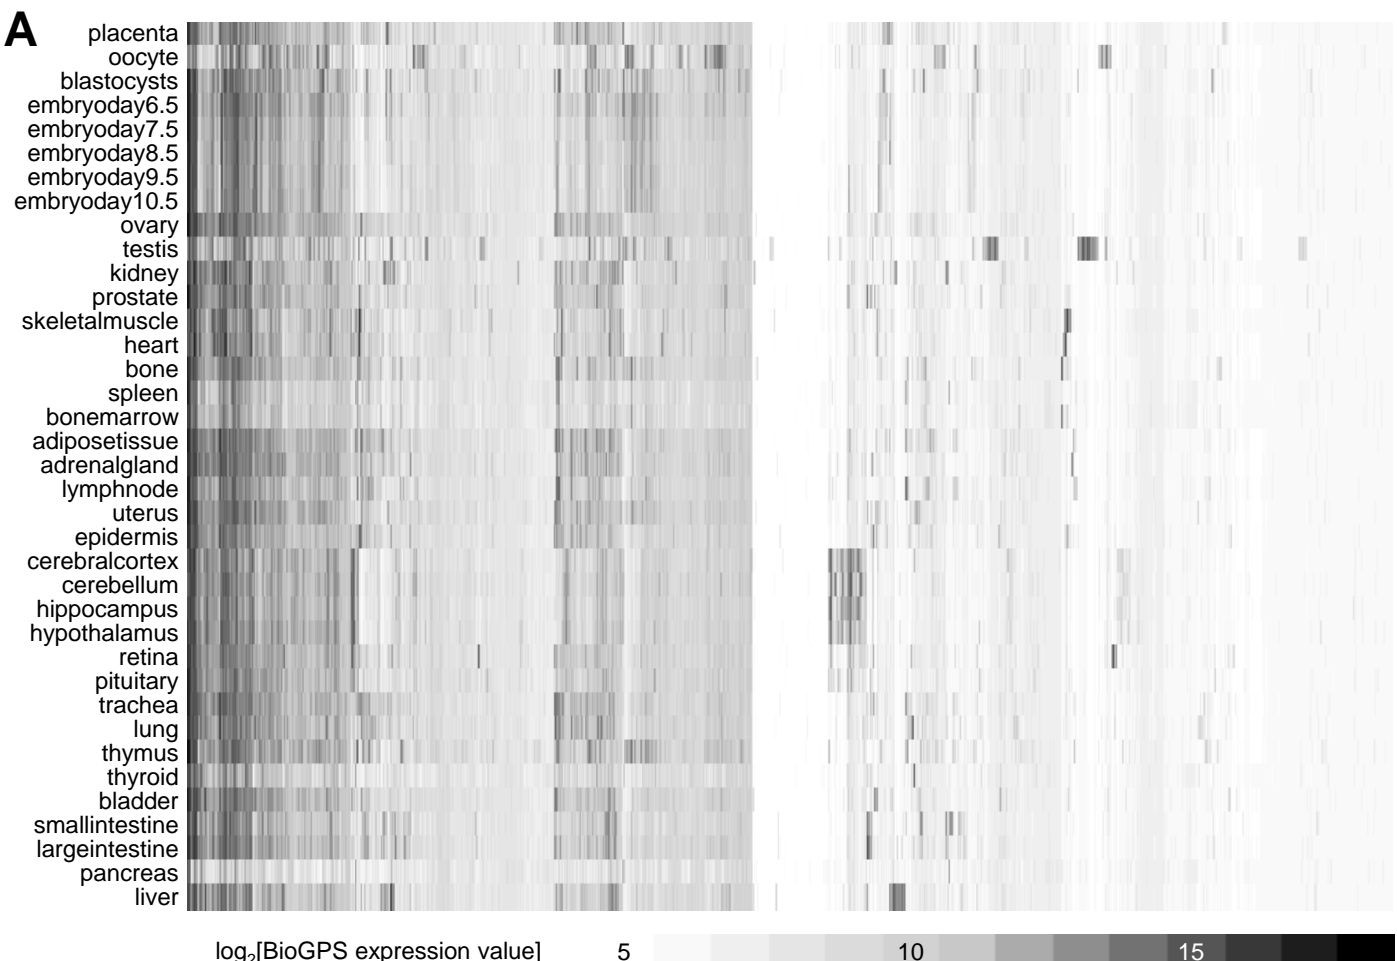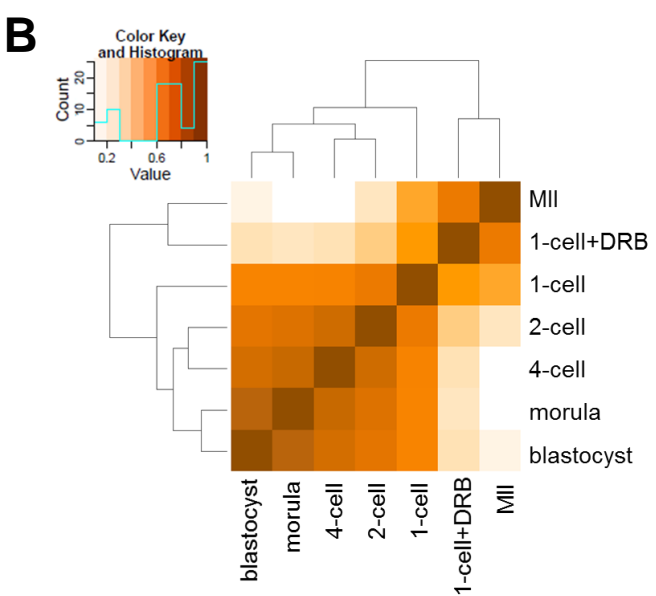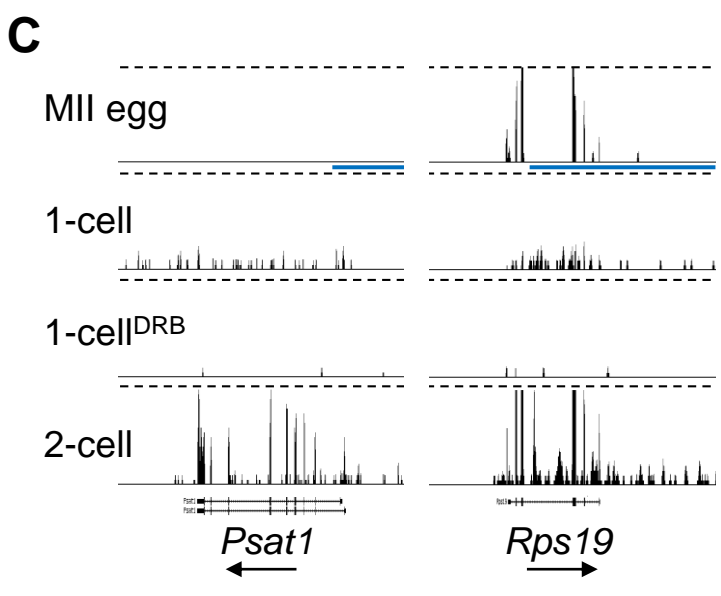

Figure S7

**A**

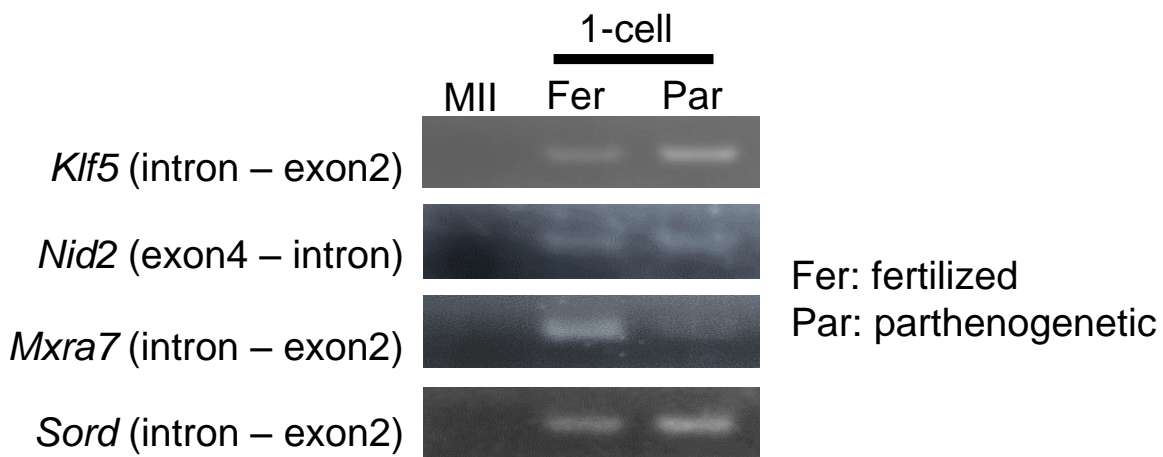

**B**

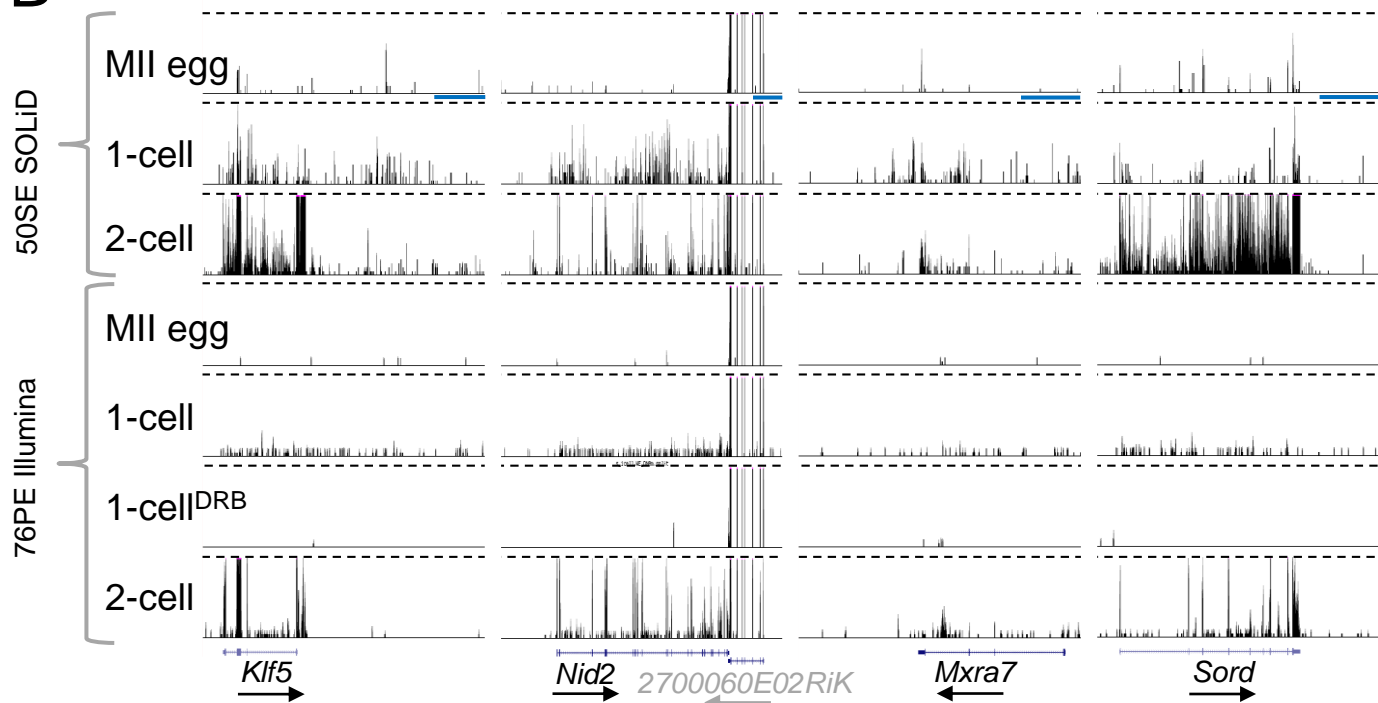

Figure S8

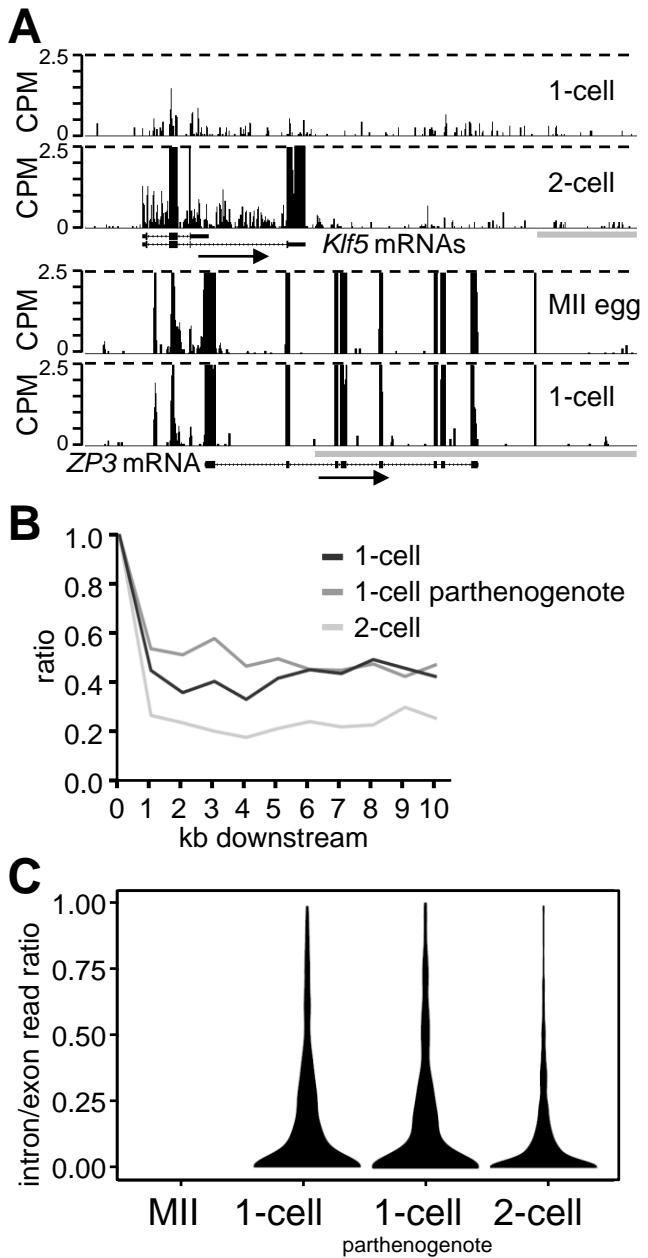

Supplement: embj0034-1523-sd1.pdf [file embj0034-1523-sd1.pdf]

Fig. 4C

Other  
experiment

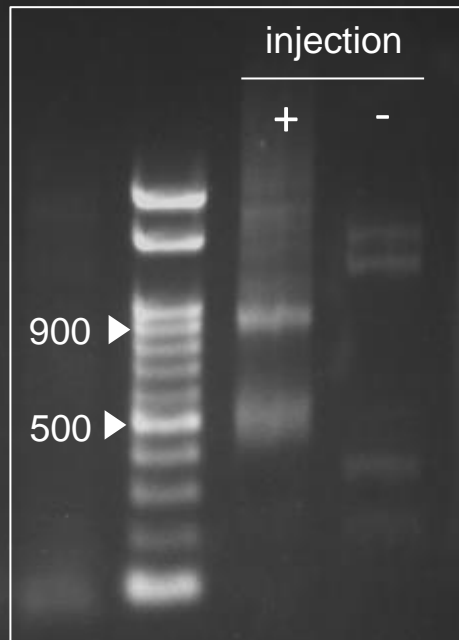

Supplement: embj0034-1523-sd8.pdf [file embj0034-1523-sd8.pdf]
